# Supplementary material for: Structure of the Novel C-terminal Domain of Vacuolar Protein Sorting 30/Autophagy-related Protein 6 and Its Specific Role in Autophagy
Source: PubMed Central journal article supplement — J Biol Chem. 2012 Mar 21;287(20):16256–66. doi: 10.1074/jbc.M112.348250 (PMC3351336; doi:10.1074/jbc.m112.348250), 2012-03-21
Supplement: supp_M112.348250_jbc.M112.348250-1.pdf [file supp_M112.348250_jbc.M112.348250-1.pdf]

## Noda et al, Figure S1

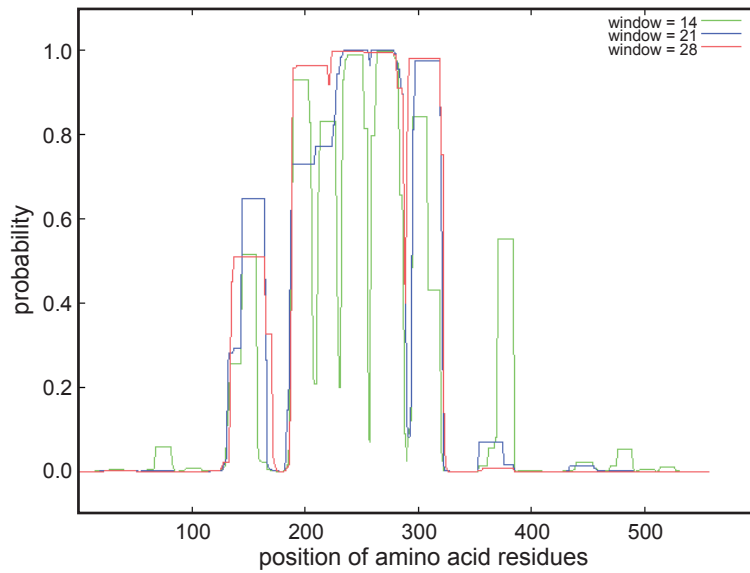

Figure S1 Prediction of a coiled-coil domain in Vps30 using COILS.  
([http://www.ch.embnet.org/software/COILS\\_form.html](http://www.ch.embnet.org/software/COILS_form.html))

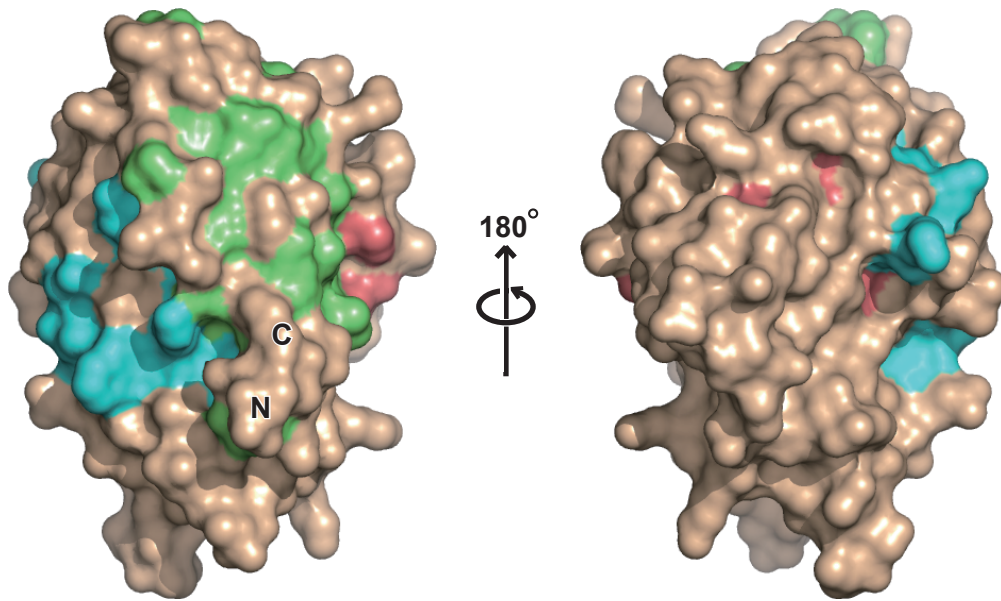

Figure S2 Evolutionarily conserved residues on the surface of Vps30. Structure of Vps30 BARA is shown as a surface model, where conserved residues in repeats 1, 2 and 3 are colored green, red and cyan, respectively. Amino and carboxy termini are labeled N and C, respectively.
